# Supplementary material
Source: ML conference proceedings conference paper supplement (https://openaccess.thecvf.com/content/CVPR2023/html/Woerl_Initialization_Noise_in_CVPR_2023_paper.html)
Supplement: Supplementary file 1 [file Woerl_Initialization_Noise_in_CVPR_2023_supplemental.zip]

Archive with 2 entries (2 files):
- Appendix.pdf
- CVPR-2023-Paper2700-Video-final2.h265.mp4
