# Supplementary material
Source: ML conference proceedings conference paper supplement (https://openaccess.thecvf.com/content/CVPR2023/html/Woerl_Initialization_Noise_in_CVPR_2023_paper.html)
Supplement: Supplementary file 1 [file Woerl_Initialization_Noise_in_CVPR_2023_supplemental.zip › Appendix.pdf]

# Appendix

Ann-Christin Woerl, Jan Disselhoff, Michael Wand  
Institute of Computer Science  
Johannes Gutenberg University Mainz, Germany  
`{awoerl, jadissel, wandm}@uni-mainz.de`

## 1. Additional Curated Examples

In the following, we want to show more curated examples for varying saliency maps. We randomly choose one sample per class, plotted in the center of each figure. The first column of every subfigure shows the mean saliency map over 30 models, while the second and third columns display the saliency map of two manually chosen networks.

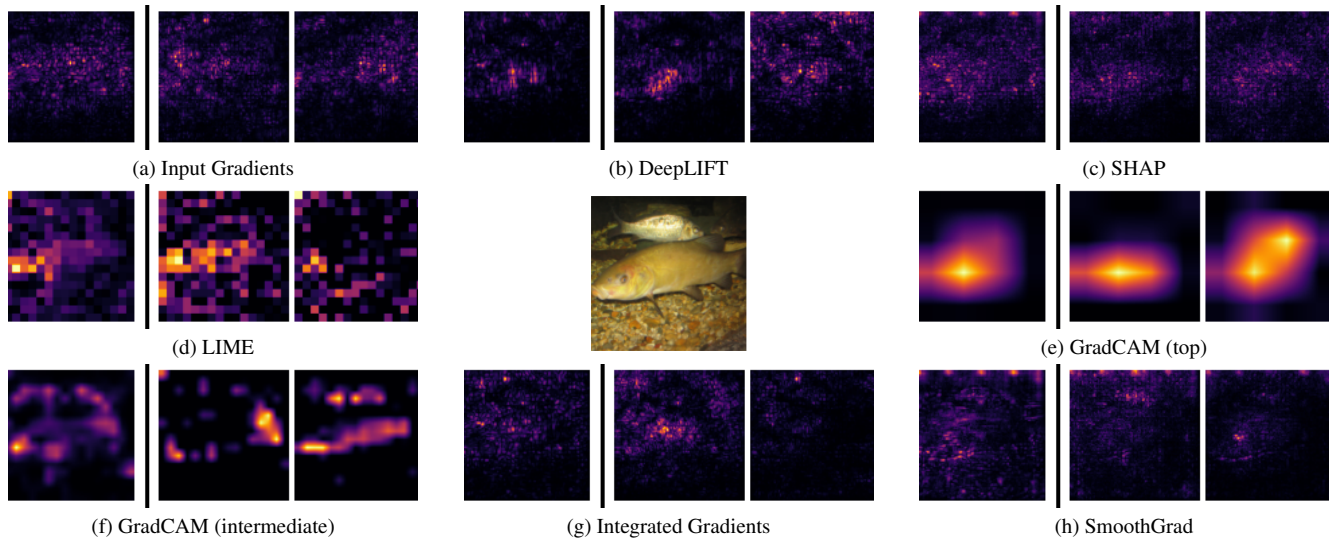

Figure 1. Comparison of Saliency Maps for multiple Saliency Methods on differently initialized models. All methods show variability in the produced results. First column: mean over 30 models, column 2-3: single model with random initialization.

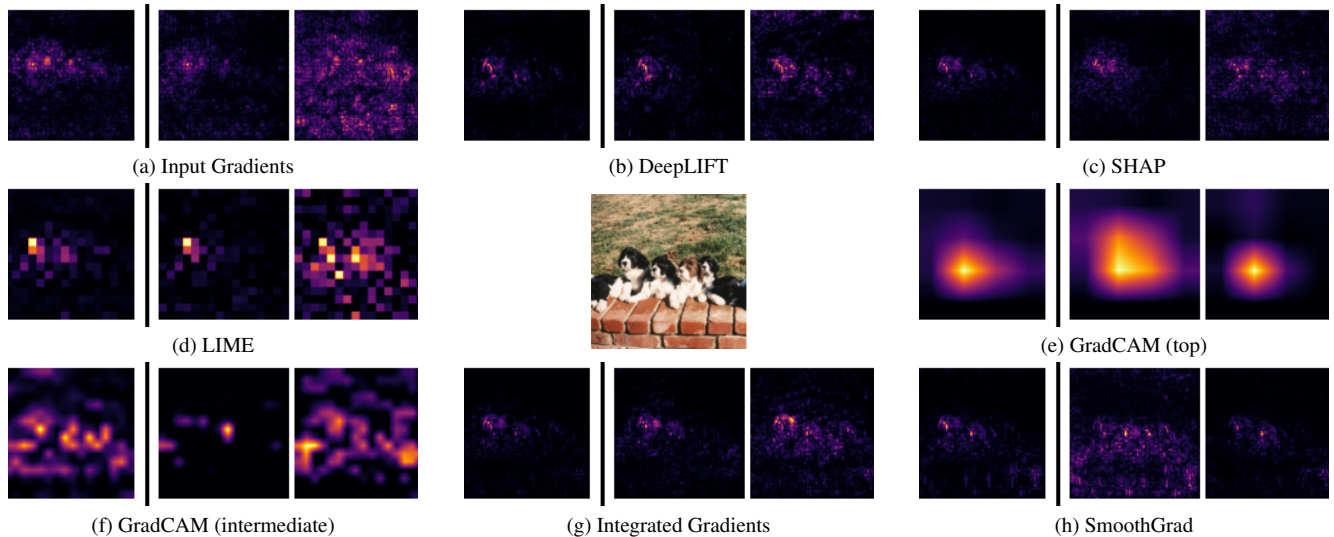

Figure 2. Comparison of Saliency Maps for multiple Saliency Methods on differently initialized models. All methods show variability in the produced results. First column: mean over 30 models, column 2-3: single model with random initialization.

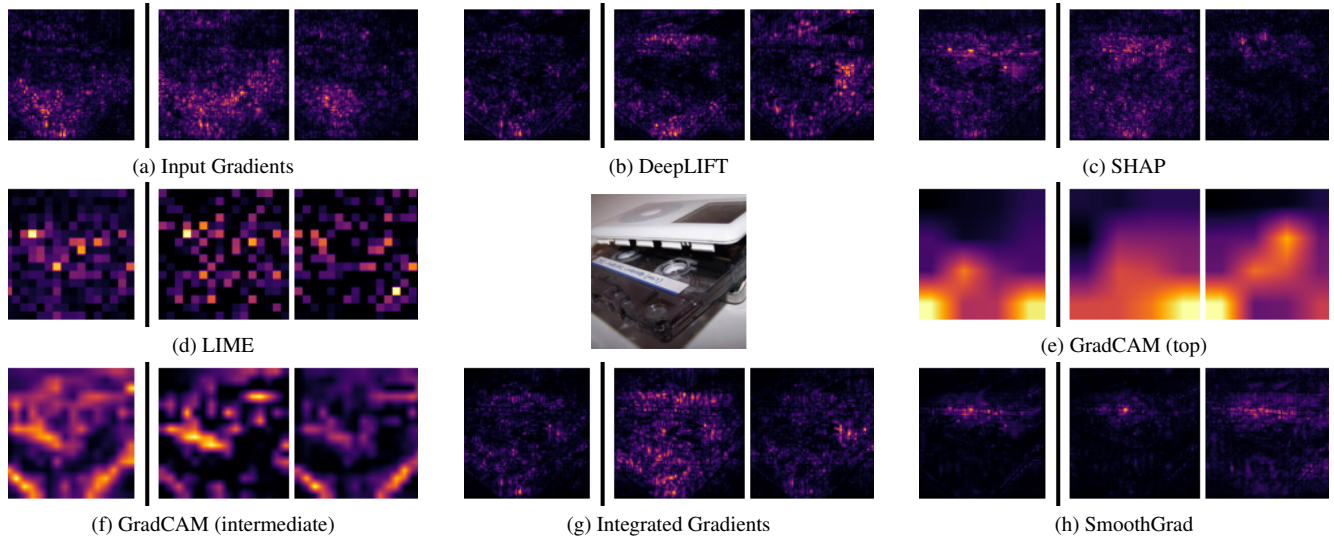

Figure 3. Comparison of Saliency Maps for multiple Saliency Methods on differently initialized models. All methods show variability in the produced results. First column: mean over 30 models, column 2-3: single model with random initialization.

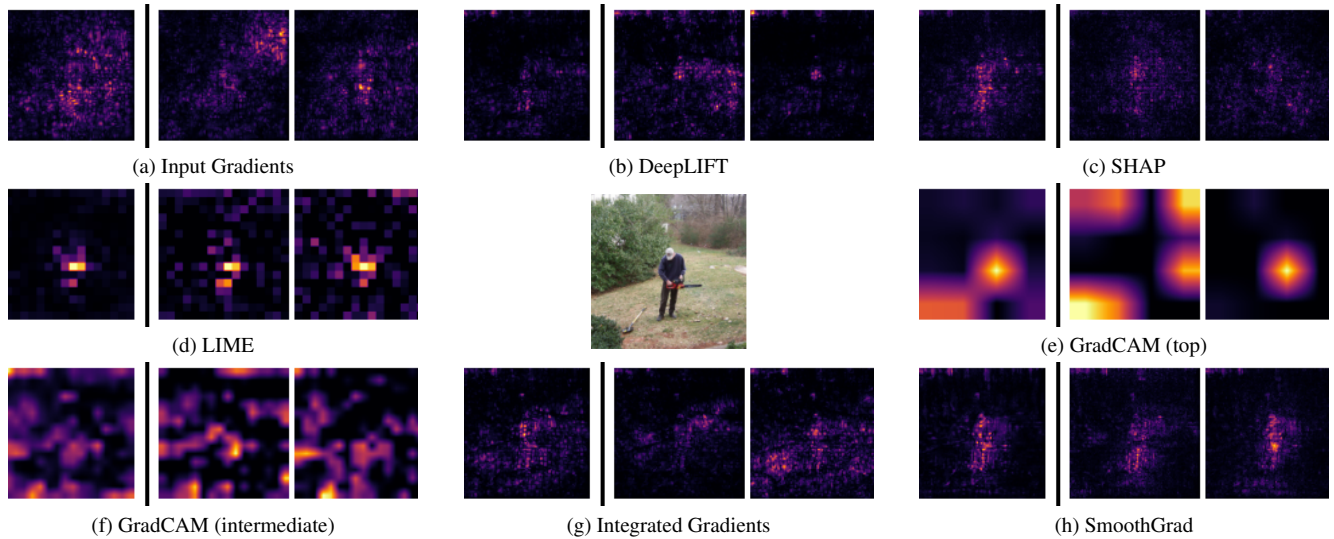

Figure 4. Comparison of Saliency Maps for multiple Saliency Methods on differently initialized models. All methods show variability in the produced results. First column: mean over 30 models, column 2-3: single model with random initialization.

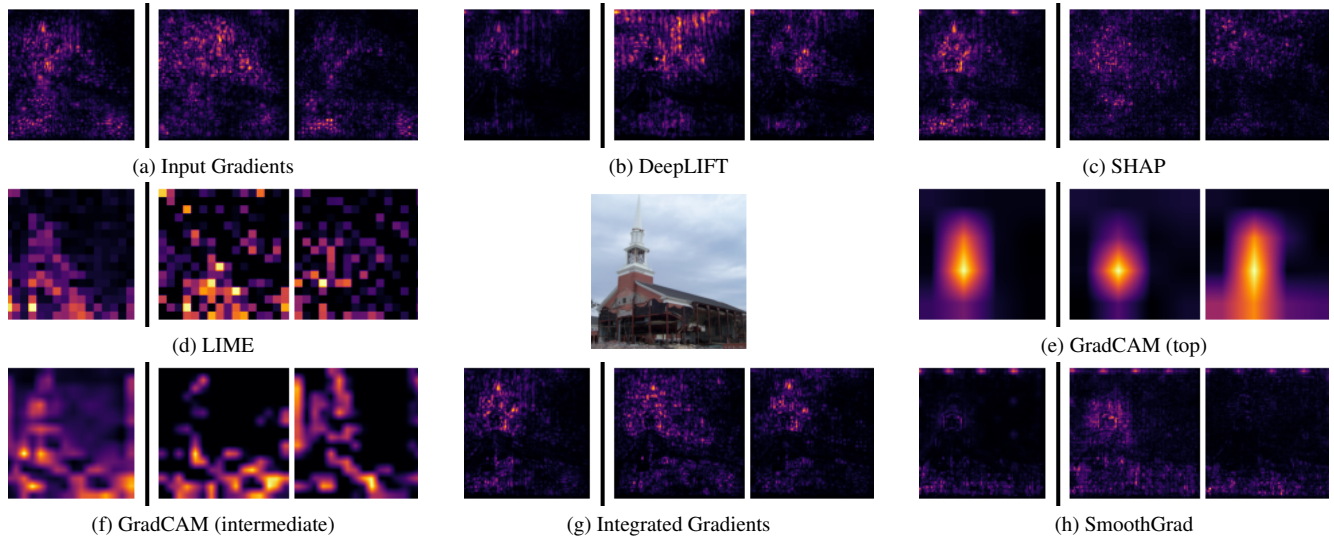

Figure 5. Comparison of Saliency Maps for multiple Saliency Methods on differently initialized models. All methods show variability in the produced results. First column: mean over 30 models, column 2-3: single model with random initialization.

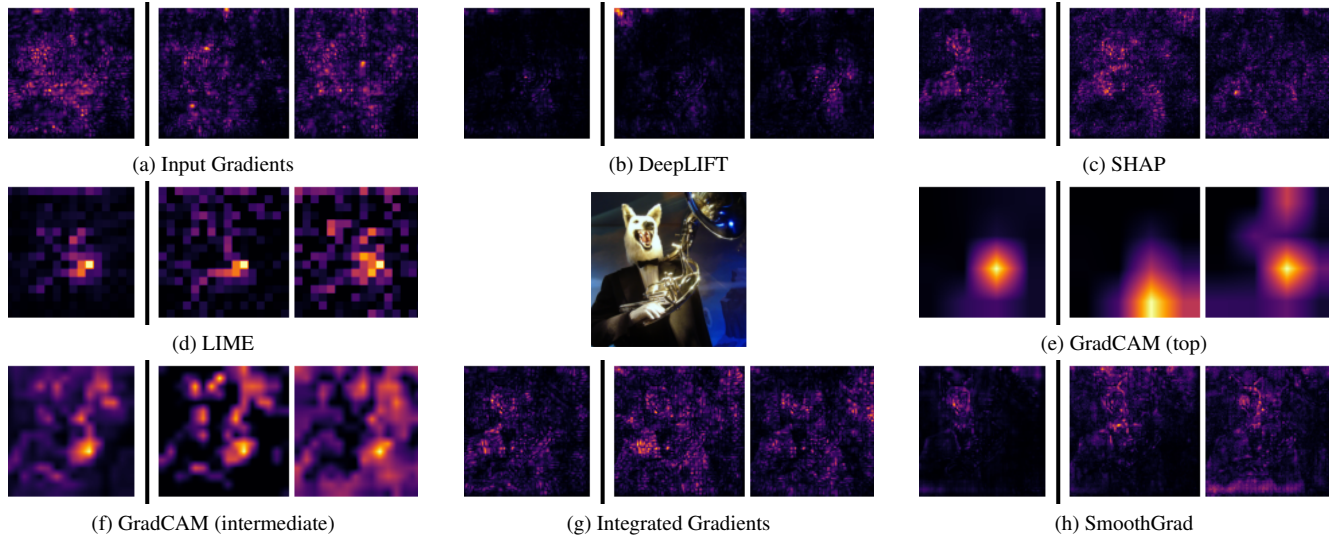

Figure 6. Comparison of Saliency Maps for multiple Saliency Methods on differently initialized models. All methods show variability in the produced results. First column: mean over 30 models, column 2-3: single model with random initialization.

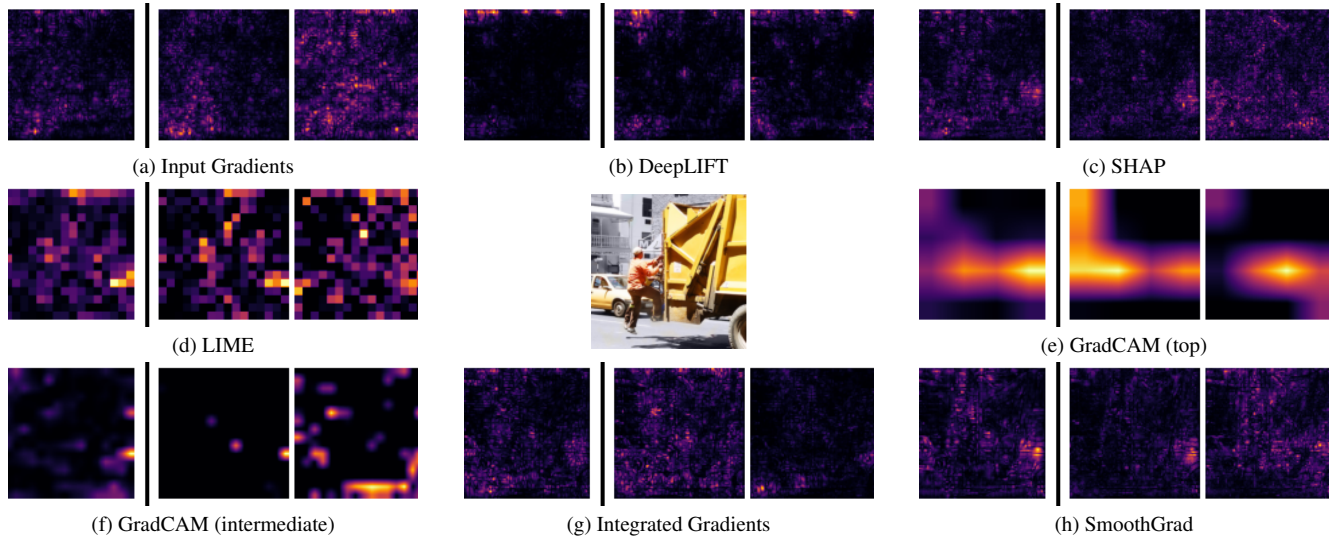

Figure 7. Comparison of Saliency Maps for multiple Saliency Methods on differently initialized models. All methods show variability in the produced results. First column: mean over 30 models, column 2-3: single model with random initialization.

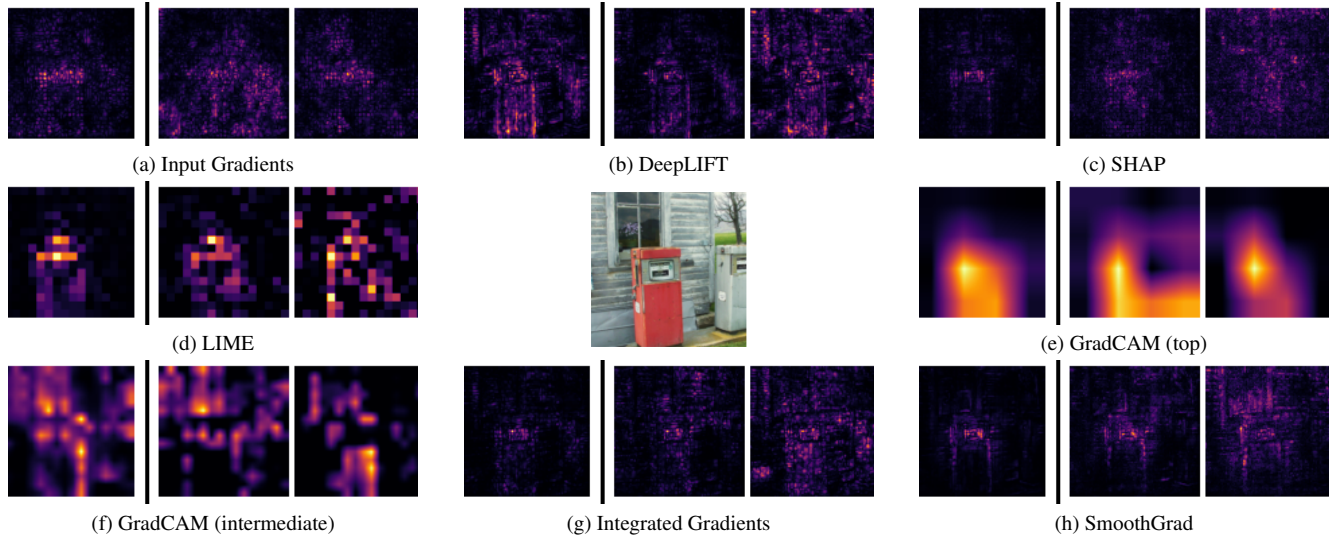

Figure 8. Comparison of Saliency Maps for multiple Saliency Methods on differently initialized models. All methods show variability in the produced results. First column: mean over 30 models, column 2-3: single model with random initialization.

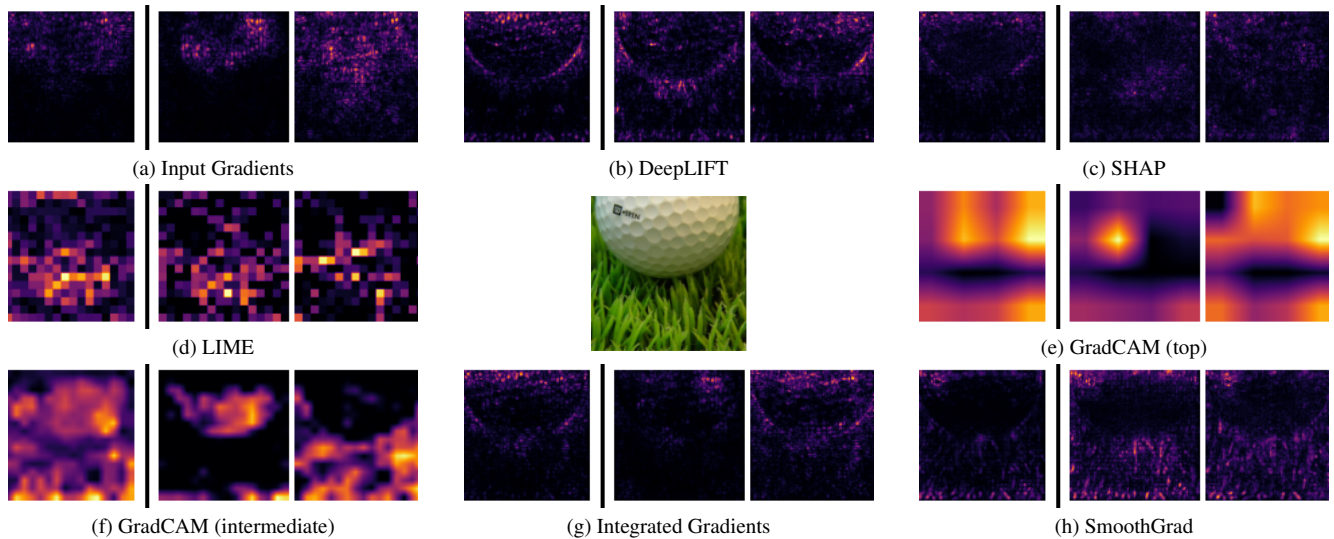

Figure 9. Comparison of Saliency Maps for multiple Saliency Methods on differently initialized models. All methods show variability in the produced results. First column: mean over 30 models, column 2-3: single model with random initialization.

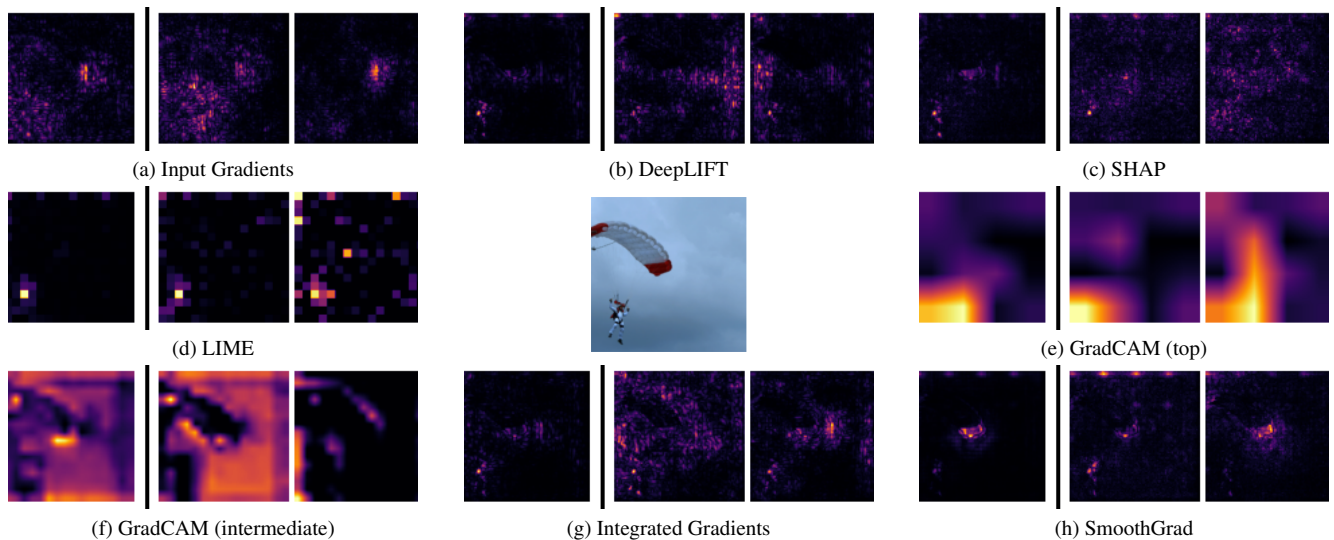

Figure 10. Comparison of Saliency Maps for multiple Saliency Methods on differently initialized models. All methods show variability in the produced results. First column: mean over 30 models, column 2-3: single model with random initialization.
